# Supplementary material for: Graphene Oxide-Silver Nanoparticles in Molecularly-Imprinted Hybrid Films Enabling SERS Selective Sensing
Source: MDPI journal article supplement (doi:10.3390/ma11091674), 2018-09-10
Supplement: s1 [file s1]

## Supplementary Materials

# Graphene oxide-silver nanoparticles in molecularly-imprinted hybrid films enabling SERS selective sensing

Y. Jiang<sup>1</sup>, D. Carboni<sup>1</sup>, L. Malfatti<sup>1\*</sup> and P. Innocenzi<sup>1\*</sup>

<sup>1</sup> Laboratorio di Scienza dei Materiali e Nanotecnologie, Dipartimento di Chimica e Farmacia, Università di Sassari, CR-INSTM, Via Vienna 2, Sassari 07041. Italy; [jyu@uniss.it](mailto:jyu@uniss.it); [dcarboni@uniss.it](mailto:dcarboni@uniss.it); [luca.malfatti@uniss.it](mailto:luca.malfatti@uniss.it); [plinio@uniss.it](mailto:plinio@uniss.it)

\* Correspondence: [luca.malfatti@uniss.it](mailto:luca.malfatti@uniss.it); [plinio@uniss.it](mailto:plinio@uniss.it); Tel.: +39-079-998630

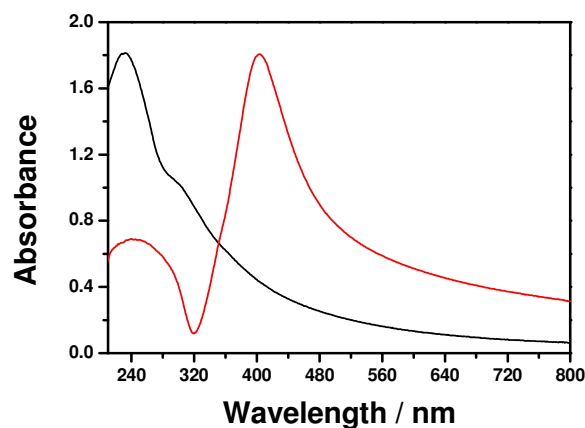

**Figure. S1.** UV-vis spectra of GO (black curve) and GO-Ag nanocomposite (red curve).

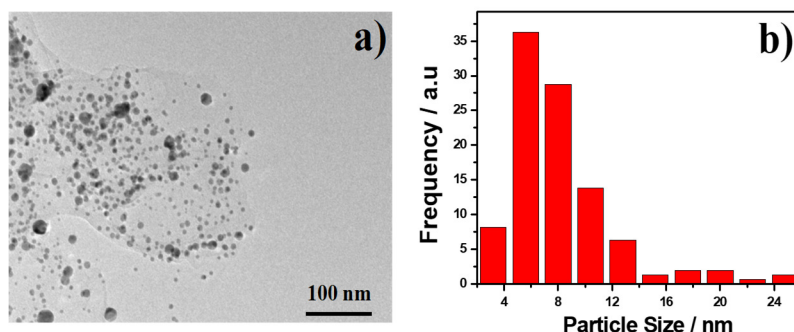

**Figure. S2** (a)TEM images of GO-Ag nanocomposite. (b) Ag particle size distribution of the GO-Ag nanocomposite.

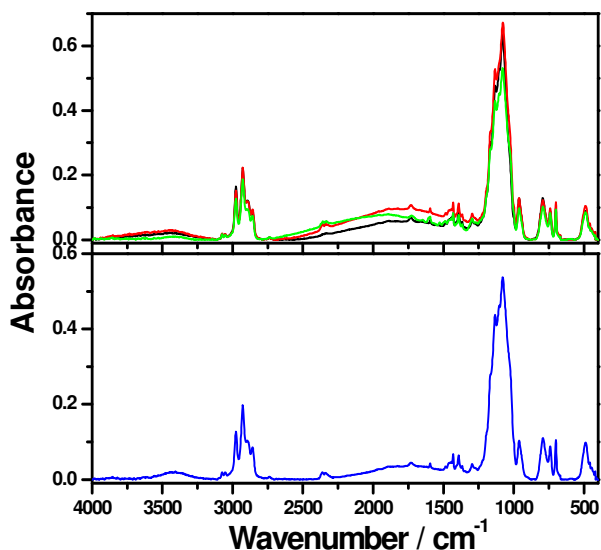

**Figure. S3.** FTIR spectra of NIF-H (black curve), NIF@GO-AgNPs (red curve) and MIF@GO-AgNPs before (green curve) and after washing samples in the 4000-400  $\text{cm}^{-1}$  range (bottom figure blue curve, bottom figure).

The FTIR spectra of not imprinted hybrid film (NIF-H), not-imprinted hybrid film (NIF@GO-AgNPs) and imprinted hybrid films (MIF@GO-AgNPs) with GO-Ag nanocomposite, in the 4000-400  $\text{cm}^{-1}$  range, are shown in **Fig. S3** of the supporting information. Two characteristic peaks at 964 and 3410  $\text{cm}^{-1}$  are attributed to the Si-OH stretching and -OH stretching. One intensive signal peaked at 1080  $\text{cm}^{-1}$  is assigned to the anti-symmetric stretching of the Si-O-Si silica band, providing the evidence of silicate network in the hybrid film. Furthermore, another band at 489  $\text{cm}^{-1}$ , which can be ascribed to the Si-O-Si bending vibration. It is also noted that two overlapped bands at 1166 and 1134  $\text{cm}^{-1}$  can be observed, which refer to the signature of unreacted or uncondensed silica, can be observed.

| Samples   | Before template removal / (nm) | After template removal / (nm) |
|-----------|--------------------------------|-------------------------------|
| NIF-H     | $1140 \pm 3$                   | $1056 \pm 5$                  |
| MIF-H     | $1055 \pm 4$                   | $965 \pm 6$                   |
| NIF-GO-Ag | $1089 \pm 10$                  | $1007 \pm 11$                 |
| MIF-GO-Ag | $963 \pm 13$                   | $892 \pm 15$                  |

**Table. S1.** Film thickness of NIF-H, MIF-H, NIF@GO-AgNPs and MIF@GO-AgNPs samples before and after CTAB removal.

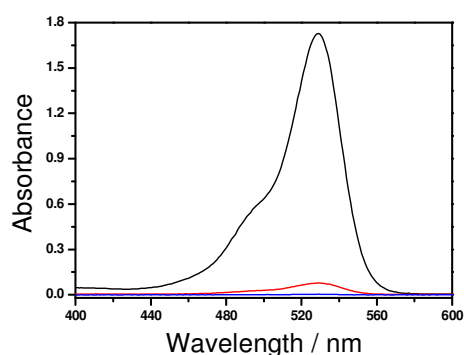

**Figure. S4.** UV-Vis spectra of the ethanol solutions used for washing the MIF-H sample (black curve for first washing, red curve for the second washing and blue curve for the third washing).

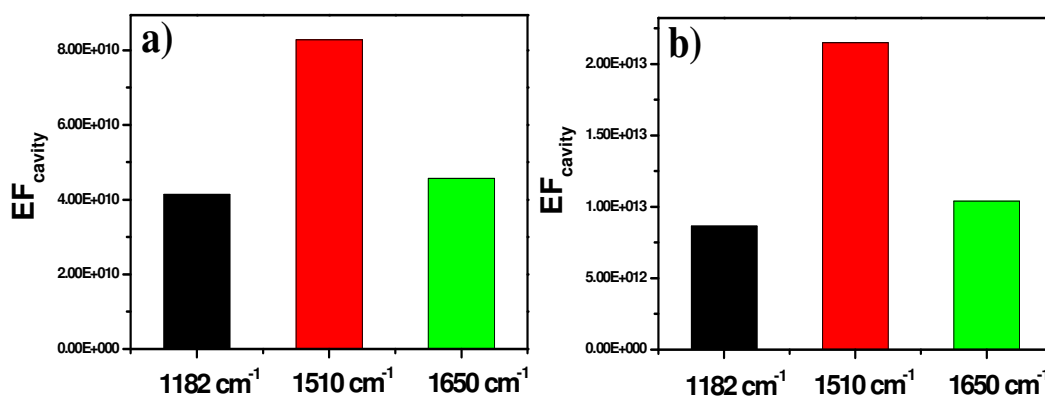

**Figure. S5.** The effect factor (EF) defines the signal enhancement per single cavity of Rh6G obtained from MIF-H (a) and MIF@GO-AgNPs (b) taken for the different Raman modes.
